# Supplementary material
Source: PubMed Central journal article supplement (PMC6139571)
Supplement: supp_RA118.003729_137802_3_supp_169107_pby9cq.pdf [file supp_RA118.003729_137802_3_supp_169107_pby9cq.pdf]

Microphthalmia-associated transcription factor regulates AChE expression during melanogenesis of B16F10 cells: a cholinergic regulator in pigmentation

Qiyun Wu<sup>1,2</sup>, Aster H.Y. Fung<sup>2</sup>, Miranda L. Xu<sup>1,2</sup>, K.M. Poon<sup>2</sup>, Etta Y.L. Liu<sup>1,2</sup>, Xiang P. Kong<sup>1</sup>, Ping Yao<sup>2</sup>, Qing P. Xiong<sup>2</sup>, Tina T.X. Dong<sup>1,2</sup>, Karl W.K. Tsim<sup>1,2</sup>

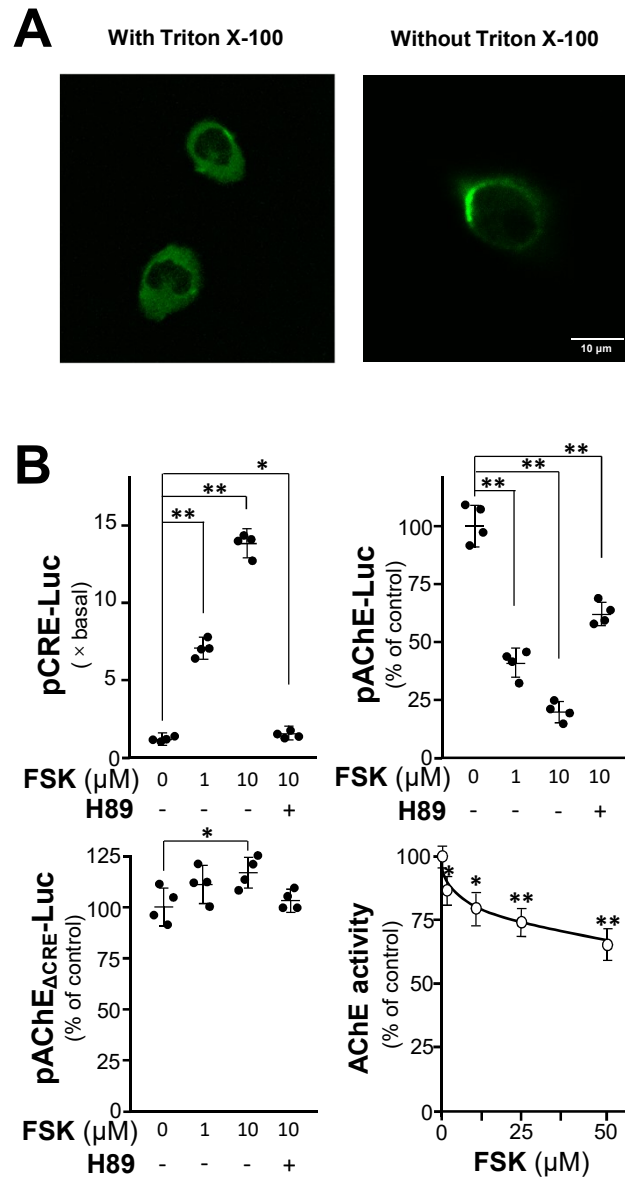

**Figure S1. (A)** Localization of AChE in B16F10 cells. B16F10 cells were fixed with 4% PFA for 15 min and stained with anti-AChE antibody, with or without 0.1% Triton X-100, followed with the Alexa 488 conjugated antibody. One representative result is shown,  $n = 4$ . **(B)** Cultured B16F10 cells transfected with pCRE-Luc, pAChE-Luc and AChE $\Delta$ CRE-Luc constructs were treated with various concentrations of forskolin (FSK) for 12 hours. H89 (10  $\mu$ M) was used as a blocker of PKA. Cell lysates were collected for luciferase assay and Ellman assay.

**Figure. S1**  
Wu et al 2018

Microphthalmia-associated transcription factor regulates AChE expression during melanogenesis of B16F10 cells: a cholinergic regulator in pigmentation

Qiyun Wu<sup>1,2</sup>, Aster H.Y. Fung<sup>2</sup>, Miranda L. Xu<sup>1,2</sup>, K.M. Poon<sup>2</sup>, Etta Y.L. Liu<sup>1,2</sup>, Xiang P. Kong<sup>1</sup>, Ping Yao<sup>2</sup>, Qing P. Xiong<sup>2</sup>, Tina T.X. Dong<sup>1,2</sup>, Karl W.K. Tsim<sup>1,2</sup>

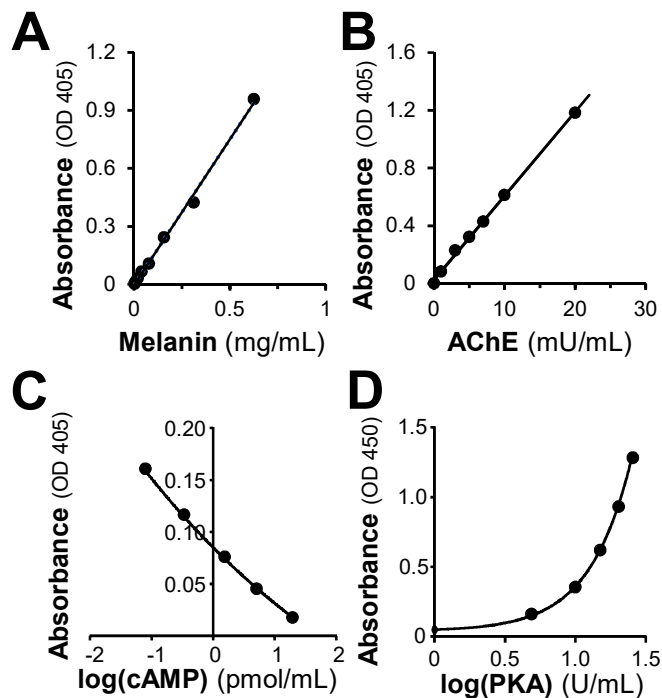

**Figure S2.** (A) Standard curve for synthetic melanin at concentration ranges between 0-1 mg/mL. (B) Standard curve for AChE activity ranges between 0-30 mU/mL for 30 min reaction time in Ellman assay. (C) Standard curve for cAMP ranges from 0-20 pmol/mL. (D) Standard curve for PKA activity ranges from 0-40 U/mL.
